# Supplementary material for: Powder X-ray diffraction assisted evolutionary algorithm for crystal structure prediction
Source: Royal Society of Chemistry journal article supplement (doi:10.1039/d4dd00269e), 2024-11-06
Supplement: d4dd00269e4.pdf [file d4dd00269e4.pdf]

## Supporting Information

### Powder X-Ray Diffraction Assisted Evolutionary Algorithm for Crystal Structure Prediction

Stefano Racioppi, Alberto Otero De la Roza, Samad Hajinazar, Eva Zurek\*

#### Table of Contents

|                                                                            |   |
|----------------------------------------------------------------------------|---|
| <b>S1. Estimation of the fitness value for a candidate structure</b> ..... | 1 |
| <b>S2. Na-hP4</b> .....                                                    | 3 |
| <b>S3 New Predicted Phases of CaCO<sub>3</sub></b> .....                   | 3 |
| <b>S4 Experimental PXRD Patterns</b> .....                                 | 4 |
| <b>S5 Script</b> .....                                                     | 5 |
| <b>S5 References</b> .....                                                 | 6 |

#### S1. Estimation of the fitness value for a candidate structure

Equation 1 (main text) provided a formula to calculate the fitness of a candidate structure. This expression, with a slight reformulation, can be used to obtain insight into the values of the multi-objective optimization weight that can guide the search more effectively towards the desired regions of the energy landscape. The following presents an example of this analysis, applied to our results for the TiO<sub>2</sub> search.

Assuming that the enthalpy and PXRD similarity index of the *s*<sup>th</sup> structure are given by  $H_s$  and  $S_s$ , respectively, the fitness is calculated from:

$$f_s = f_H + f_S = (1 - w) \left( \frac{H_{max} - H_s}{H_{max} - H_{min}} \right) + w \left( \frac{S_{max} - S_s}{S_{max} - S_{min}} \right)$$

where  $w$  is the weight for the similarity index.  $H_{max}$  and  $H_{min}$  are the enthalpies of the highest and lowest enthalpy structures, whereas  $S_{max}$  and  $S_{min}$  are the similarity indices of the structures that afford the worst/best match with the PXRD.

For the enthalpy, we can write

$$H_{max} = H_{min} + \Delta H$$

which can be used to reformulate the enthalpy's share to the total fitness as:

$$f_H = (1 - w) \left( \frac{\Delta H + H_{min} - H_s}{\Delta H + H_{min} - H_{min}} \right) = (1 - w) \left( \frac{\Delta H - [H_s - H_{min}]}{\Delta H} \right)$$

Assuming that our target  $H_s$  is above the minimum enthalpy in the pool by an absolute value of  $E_s$  eV/atom, then the enthalpy's contribution to the fitness value can be expressed as:

$$f_H = (1 - w) \left( \frac{\Delta H - E_s}{\Delta H} \right) = (1 - w) \left( 1.0 - \frac{E_s}{\Delta H} \right)$$

A similar result can be obtained for the PXR objective's contribution to the fitness. Considering that  $S_{min} = 0$  and  $S_{max} = 1$ ,  $S_s$  is already the absolute value above the minimum of the objective. Hence:

$$f_S = w \left( \frac{S_{max} - S_s}{S_{max} - S_{min}} \right) = w \left( \frac{\Delta S - S_s}{\Delta S} \right) = w(1.0 - S_s)$$

Combining these results, the structure's fitness can be expressed as:

$$f_s = \left( 1.0 - \frac{E_s}{\Delta H} \right) - w \left( S_s - \frac{E_s}{\Delta H} \right)$$

Given the range of enthalpies explored in the search, similarity index, and enthalpy of a candidate structure, one can use the above expression to estimate its fitness as a function of the PXR objective's weight.

As an example, in a typical search for the  $\text{TiO}_2$  polymorphs, the enthalpies relative to Anatase [meV/atom] and dissimilarity index for Anatase, Brookite, and Rutile were computed to be:

| Structure | $E_s$ | $S_s$ |
|-----------|-------|-------|
| Anatase   | 0.0   | 0.31  |
| Brookite  | 13.5  | 0.01  |
| Rutile    | 26.7  | 0.91  |

Then, considering that in this search we found  $\Delta H = 12.87$  eV/atom and using  $\Delta S = 1$ , the above formula results in the following values for the fitness of these phases as a function of the optimization weight as reported in Figure 3 in the main text.

| weight | Anatase | Brookite | Rutile |
|--------|---------|----------|--------|
| 0      | 1       | 0.997    | 0.994  |
| 0.1    | 0.9637  | 0.9969   | 0.9061 |
| 0.2    | 0.9274  | 0.9968   | 0.8182 |
| 0.3    | 0.8911  | 0.9967   | 0.7304 |
| 0.4    | 0.8548  | 0.9967   | 0.6425 |
| 0.5    | 0.8185  | 0.9966   | 0.5546 |
| 0.6    | 0.7822  | 0.9965   | 0.4667 |

|     |        |        |        |
|-----|--------|--------|--------|
| 0.7 | 0.7459 | 0.9964 | 0.3789 |
| 0.8 | 0.7096 | 0.9963 | 0.291  |
| 0.9 | 0.6733 | 0.9962 | 0.2031 |
| 1   | 0.637  | 0.9961 | 0.1152 |

It should be noted that the fitness values represent the suitability of the candidate structures in terms of the considered objectives in the global optimization. XtalOpt employs the calculated fitness values, along with the user-specified parent pool size to determine a structure's selection probability (to be a parent for the next generation), as described fully in Reference 1.

## S2. Na-*hP4*

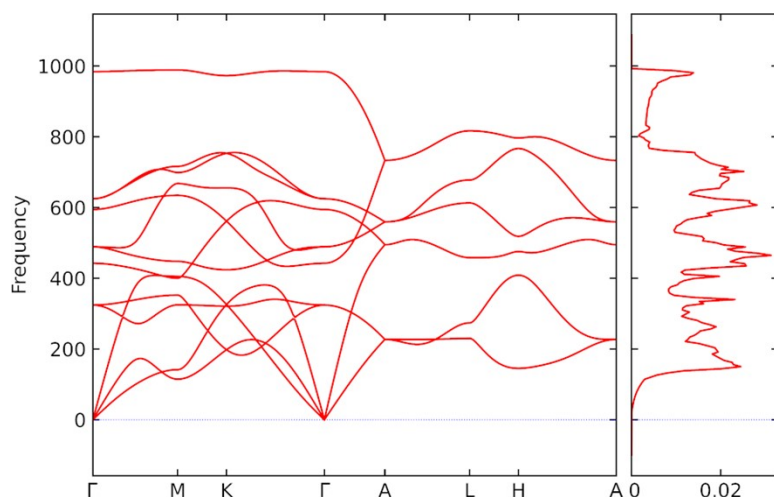

**Figure S1.** Phonon spectrum of Na-*hP4*\* calculated with VASP, version 6.4.2,<sup>2,3</sup> using the PBE<sup>4,5</sup> exchange-correlation functional and a plane-wave basis set with an energy cutoff of 1200 eV. The k-point mesh generated using the  $\Gamma$ -centered Monkhorst-Pack scheme,<sup>6</sup> was such that the number of divisions along each reciprocal lattice vector was selected so that the product of this number with the real lattice constant was greater than or equal to 60 Å. The Tetrahedron method was adopted<sup>7</sup>.

## S3 New Predicted Phases of CaCO<sub>3</sub>

A new *Pca2*<sub>1</sub> structure was generated by our PXRD assisted structure search. The interesting aspect of this structure is the small peak at  $\sim 29^\circ$  in  $2\theta$  (Figure S2), which was consistently observed in multiple experiments<sup>8-11</sup> but often assigned to calcite impurities.<sup>9</sup> However, the evident peak at  $\sim 35^\circ$  would rule out *Pca2*<sub>1</sub> as a possible candidate, since it is not observed experimentally. An additional, relatively stable, *P2*<sub>1</sub>/*c* phase was predicted as well, which turns out to be a distortion of Meyer's *Pnma* structure.

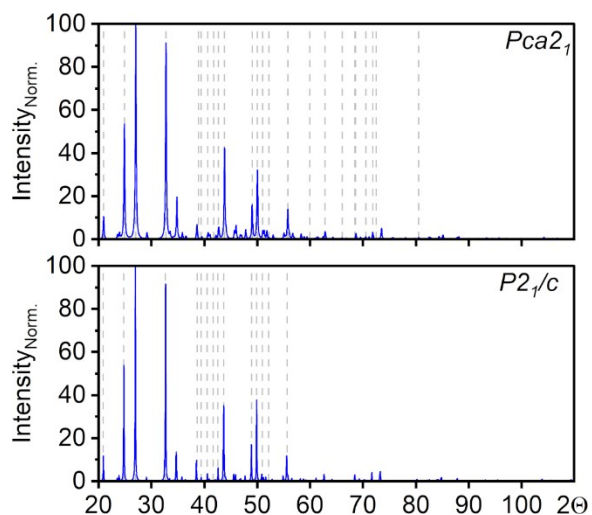

**Figure S2.** Simulated PXRD pattern for the predicted  $Pca2_1$  (top) and  $P2_1/c$  (bottom) phases (Cu  $K\alpha$  radiation), after the VC-GPWDF refinement over the experimental diffraction data (dashed grey lines) of Le Bail's<sup>9</sup> (top) and DuPont's<sup>8</sup> (bottom) data.

#### S4 Experimental PXRD Patterns

List of the experimental PXRD pattern used in the present work.

##### Na-hP4<sup>12</sup>

| $2\theta$ | $I$ |
|-----------|-----|
| 37.0      | 40  |
| 43.3      | 100 |
| 62.9      | 80  |
| 63.4      | 80  |
| 75.1      | 10  |
| 79.2      | 10  |

##### Vaterite Le Bail<sup>9</sup>

| $2\theta$ | $I$   |
|-----------|-------|
| 20.953    | 19.6  |
| 24.883    | 62.1  |
| 27.05     | 100.0 |
| 32.753    | 92.6  |
| 38.871    | 6.2   |
| 39.381    | 4.9   |
| 40.672    | 4.8   |
| 41.774    | 2.9   |
| 42.673    | 11.2  |
| 43.822    | 51.3  |
| 49.049    | 18.3  |
| 50.023    | 47.9  |

|        |      |
|--------|------|
| 51.039 | 4.1  |
| 52.204 | 1.3  |
| 55.767 | 16.1 |
| 59.898 | 2.7  |
| 62.842 | 3.6  |
| 66.111 | 1.0  |
| 68.609 | 3.8  |
| 68.455 | 1.5  |
| 70.533 | 1.3  |
| 71.840 | 5.9  |
| 72.496 | 7.2  |
| 80.532 | 1.3  |

### Vaterite Dupont<sup>8</sup>

| <b>2θ</b> | <b>I</b> |
|-----------|----------|
| 20.866    | 20       |
| 24.775    | 43       |
| 26.940    | 81       |
| 32.646    | 100      |
| 38.669    | 6        |
| 39.373    | 1        |
| 40.555    | 6        |
| 41.640    | 2        |
| 42.565    | 17       |
| 43.697    | 64       |
| 48.923    | 25       |
| 49.906    | 84       |
| 50.924    | 5        |
| 52.165    | 2        |
| 55.644    | 22       |

### S5 Script

Here we report the script used to generate the similarity index value used in the *multi-objective* search. It first generate the input file (pxrd.cri) for critic2,<sup>13</sup> which is then run taking the list of peaks listed in pxrd.peaks. The output (pxrd.cro), is then parsed to extract the similarity index and print it in pxrd.dat, which will be read by XtalOpt.

```
###  
echo "  
TRICK GAUCOMP CONTCAR pxrd.peaks global maxfeval 5000  
> pxrd.cri
```

```
critic2 pxrd.cri pxrd.cro
```

```
grep 'DIFF' pxrd.cro | awk '{printf "%.8f\n", $4}' | tail -1 > pxrd.dat  
###
```

## S5 References

- 1 S. Hajinazar and E. Zurek, 2024, arXiv:2405.02138.
- 2 G. Kresse and J. Hafner, *Phys. Rev. B*, 1994, **49**, 14251–14269.
- 3 G. Kresse and D. Joubert, *Phys. Rev. B - Condens. Matter Mater. Phys.*, 1999, **59**, 1758–1775.
- 4 J. P. Perdew, K. Burke and M. Ernzerhof, *Phys. Rev. Lett.*, 1996, **77**, 3865–3868.
- 5 J. P. Perdew, K. Burke and M. Ernzerhof, *Phys. Rev. Lett.*, 1996, **77**, 3865–3868.
- 6 H. J. Monkhorst and J. D. Pack, *Phys. Rev. B - Condens. Matter Mater. Phys.*, 1976, **13**, 5188–5192.
- 7 P. E. Blöchl, O. Jepsen and O. K. Andersen, *Phys. Rev. B*, 1994, **49**, 16223–16233.
- 8 L. Dupont, F. Portemer and M. Figlarz, *J. Mater. Chem.*, 1997, **7**, 797–800.
- 9 A. Le Bail, S. Ouhenia and D. Chateigner, *Powder Diffr.*, 2011, **26**, 16–21.
- 10 E. Mugnaioli, I. Andrusenko, T. Schüler, N. Loges, R. E. Dinnebier, M. Panthöfer, W. Tremel and U. Kolb, *Angew. Chemie - Int. Ed.*, 2012, **51**, 7041–7045.
- 11 X. San, J. Hu, M. Chen, H. Niu, P. J. M. Smeets, C. D. Malliakas, J. Deng, K. Koo, R. dos Reis, V. P. Dravid and X. Hu, *Nat. Commun.*, 2023, **14**, 7858.
- 12 D. N. Polsin, A. Lazicki, X. Gong, S. J. Burns, F. Coppari, L. E. Hansen, B. J. Henderson, M. F. Huff, M. I. McMahon, M. Millot, R. Paul, R. F. Smith, J. H. Eggert, G. W. Collins and J. R. Rygg, *Nat. Commun.*, 2022, **13**, 2534.
- 13 A. Otero-De-La-Roza, E. R. Johnson and V. Luaña, *Comput. Phys. Commun.*, 2014, **185**, 1007–1018.
